# Supplementary material for: Cloning, Expression, and Odorant Binding Characteristics of the Chemosensory Protein 1 in Asecodes hispinarum, a Parasitoid of the Coconut Leaf Beetle (Brontispa longissima)
Source: Research Square preprint supplement (doi:10.21203/rs.3.rs-6551684/v1), 2025-05-07
Supplement: Supplementary file 1 [file ae125f3179e2f7b19b8805c1.docx]

Table 1 Binding affinities of ligands to AhisCSP1

| Ligands | Structural formula | IC50 (μmol/L) | Ki (μmol/L) |
| --- | --- | --- | --- |
| Butylated hydroxytoluene |  | - | - |
| 2-Ethyl-1,4-dimethylbenzene |  | - | - |
| 1,3-Diethyl-5-methylbenzene |  | - | - |
| Pentadecane |  | 39.25 | 34.28 |
| 2-Butenylbenzene |  | - | - |
| Dicyclopentadiene |  | - | - |
| Acetophenone |  | - | - |
| 2-Ethyl-1-hexanol |  | 44.68 | 39.72 |
| L-α-Terpineol |  | 25.47 | 21.26 |
| Benzyl alcohol |  | 29.89 | 25.42 |
| 3-Phenylpropionic acid methyl ester |  | 32.43 | 27.96 |
| Butyl benzoate |  | 61.73 | 53.45 |
| Methyleugenol |  | 65.69 | 58.27 |
| Isohexadecane |  | 23.92 | 19.76 |

Values are means of three independent experiments.
